# Supplementary material for: Richness and density jointly determine context dependence in bacterial interactions
Source: PubMed Central journal article supplement (PMC10770726; doi:10.1016/j.isci.2023.108654), 2023-12-07
Supplement: mmc1.pdf [file mmc1.pdf]

**iScience, Volume 27**

**Supplemental information**

**Richness and density jointly  
determine context dependence  
in bacterial interactions**

**Keven D. Dooley and Joy Bergelson**

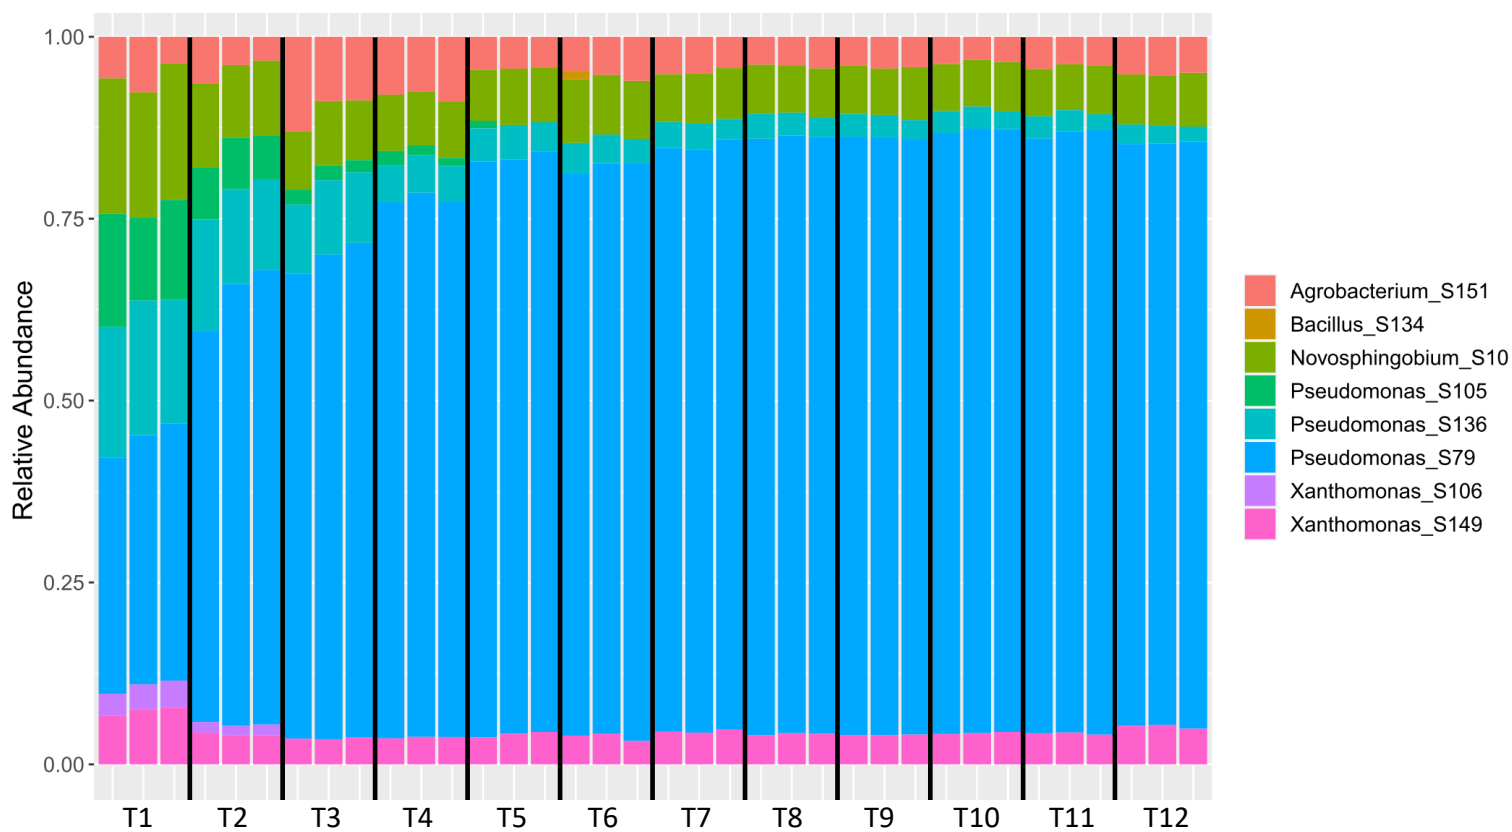

Supplementary Figure 1: A time course of community dynamics for an 8-member synthetic community, STAR Methods. Each set of three stacked bars represents the composition of three replicates 24 hours after initial assembly or passaging for 12 days (T1 – T12). Dynamics play out quickly within the first four days and settle into a stable composition to until at least 12 days post initial assembly.

### Context-dependent presence of *Lysinibacillus\_S113*

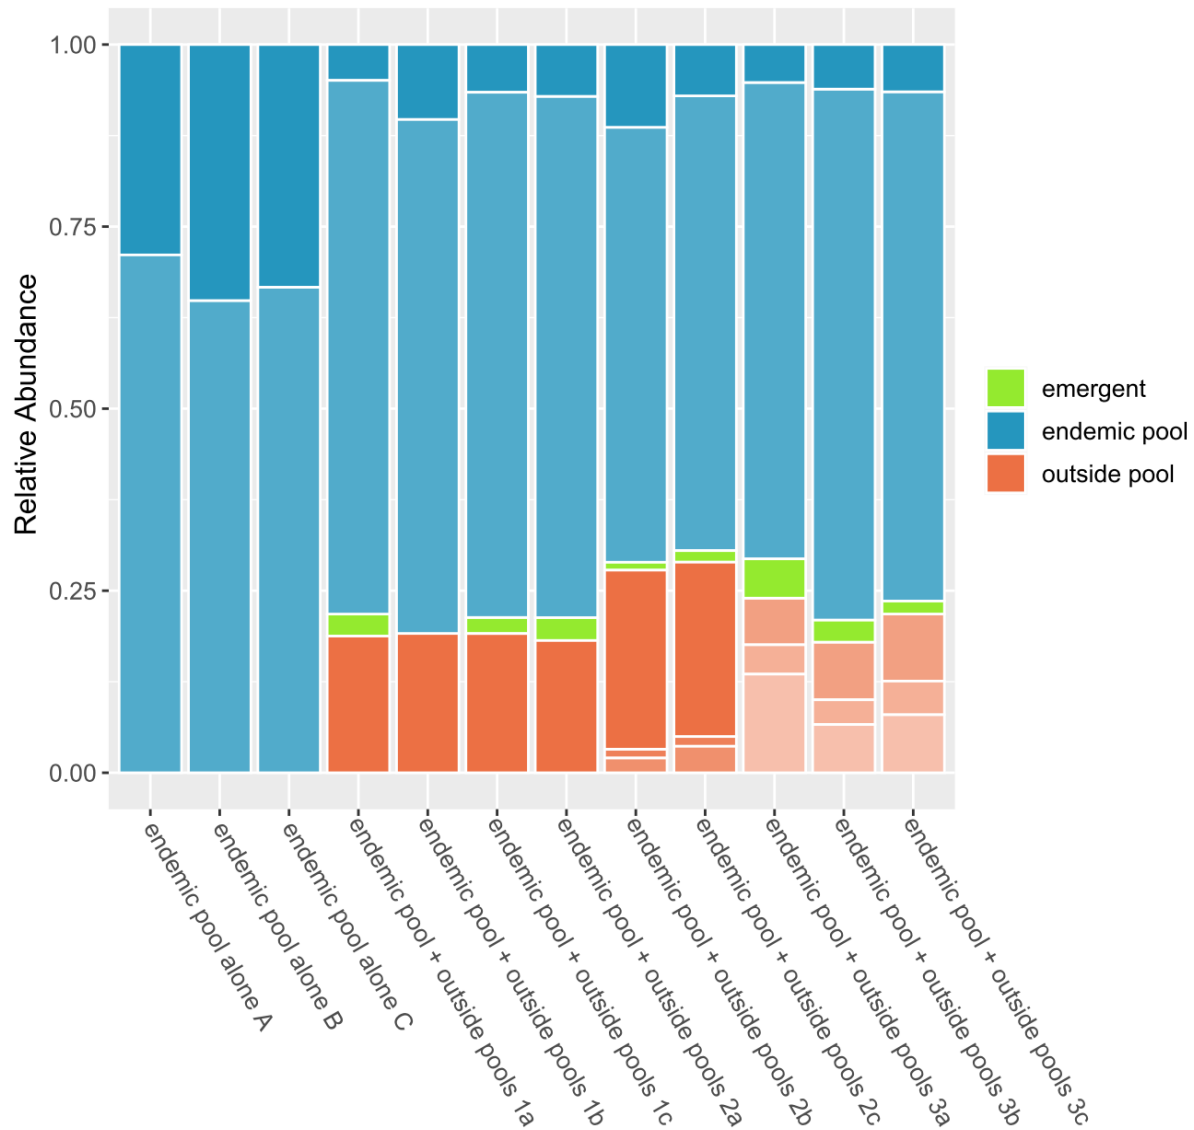

Supplementary Figure 2: An example of context-dependent coexistence of a *Lysinibacillus* isolate (“emergent” isolate) from the initial set of synthetic communities, related to Figure 1. That *Lysinibacillus* isolate was excluded by the other members of the 8-member pool to which it belonged (“endemic pool alone A-C”). However, in the three additional contexts shown here (from that endemic pool and at least one outside pool) which were assembled from that pool of 8 and at least one other pool, the *Lysinibacillus* isolate persisted to 6-days. The relative abundances of the non-emergent isolates are depicted by stacked bars in shades of blue (if from the “endemic pool” to which the *Lysinibacillus* isolate belonged) or shades of orange (if from pools other than the endemic pool).

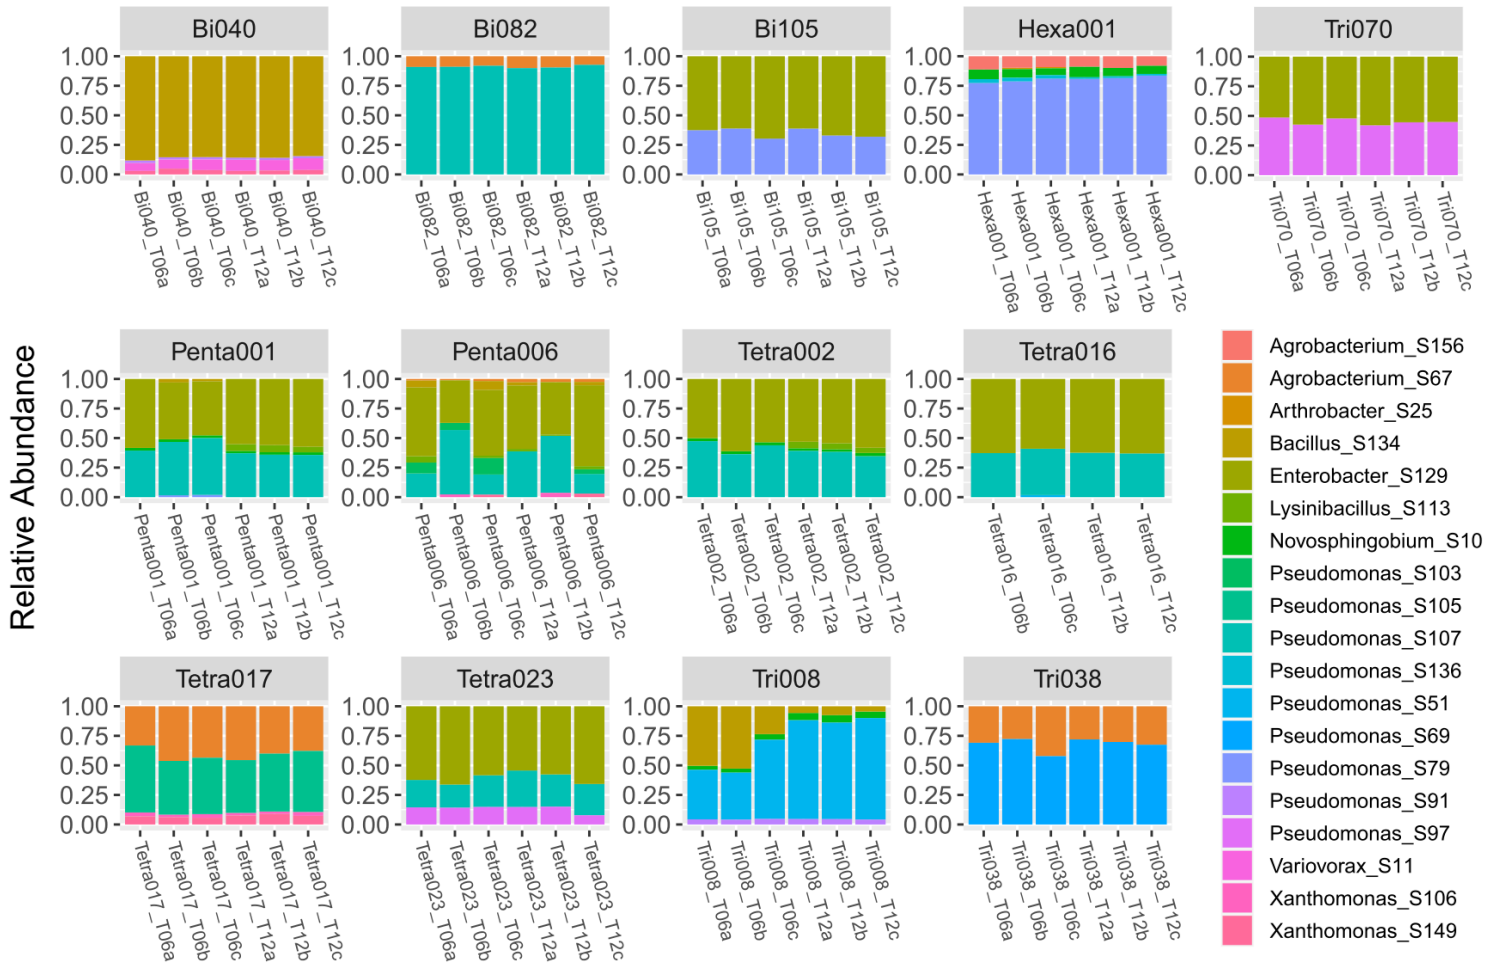

Supplementary Figure 3: A comparison of day-6 and day-12 compositions for 13 different communities assembled for measuring interactions, STAR Methods. Timepoint is displayed in the x-axis text for each stacked bar. Stacked bars are colored by isolate identity. As seen in the full time-series (supplementary figure 1), community compositions after 6 days is generally representative of community compositions after 12 days. These communities were assembled from pools varying in initial richness (2-8 isolates), but all show generally consistent compositions between days 6 and 12, suggesting assemblages with higher initial richness do not require a longer period to reach a stable composition.

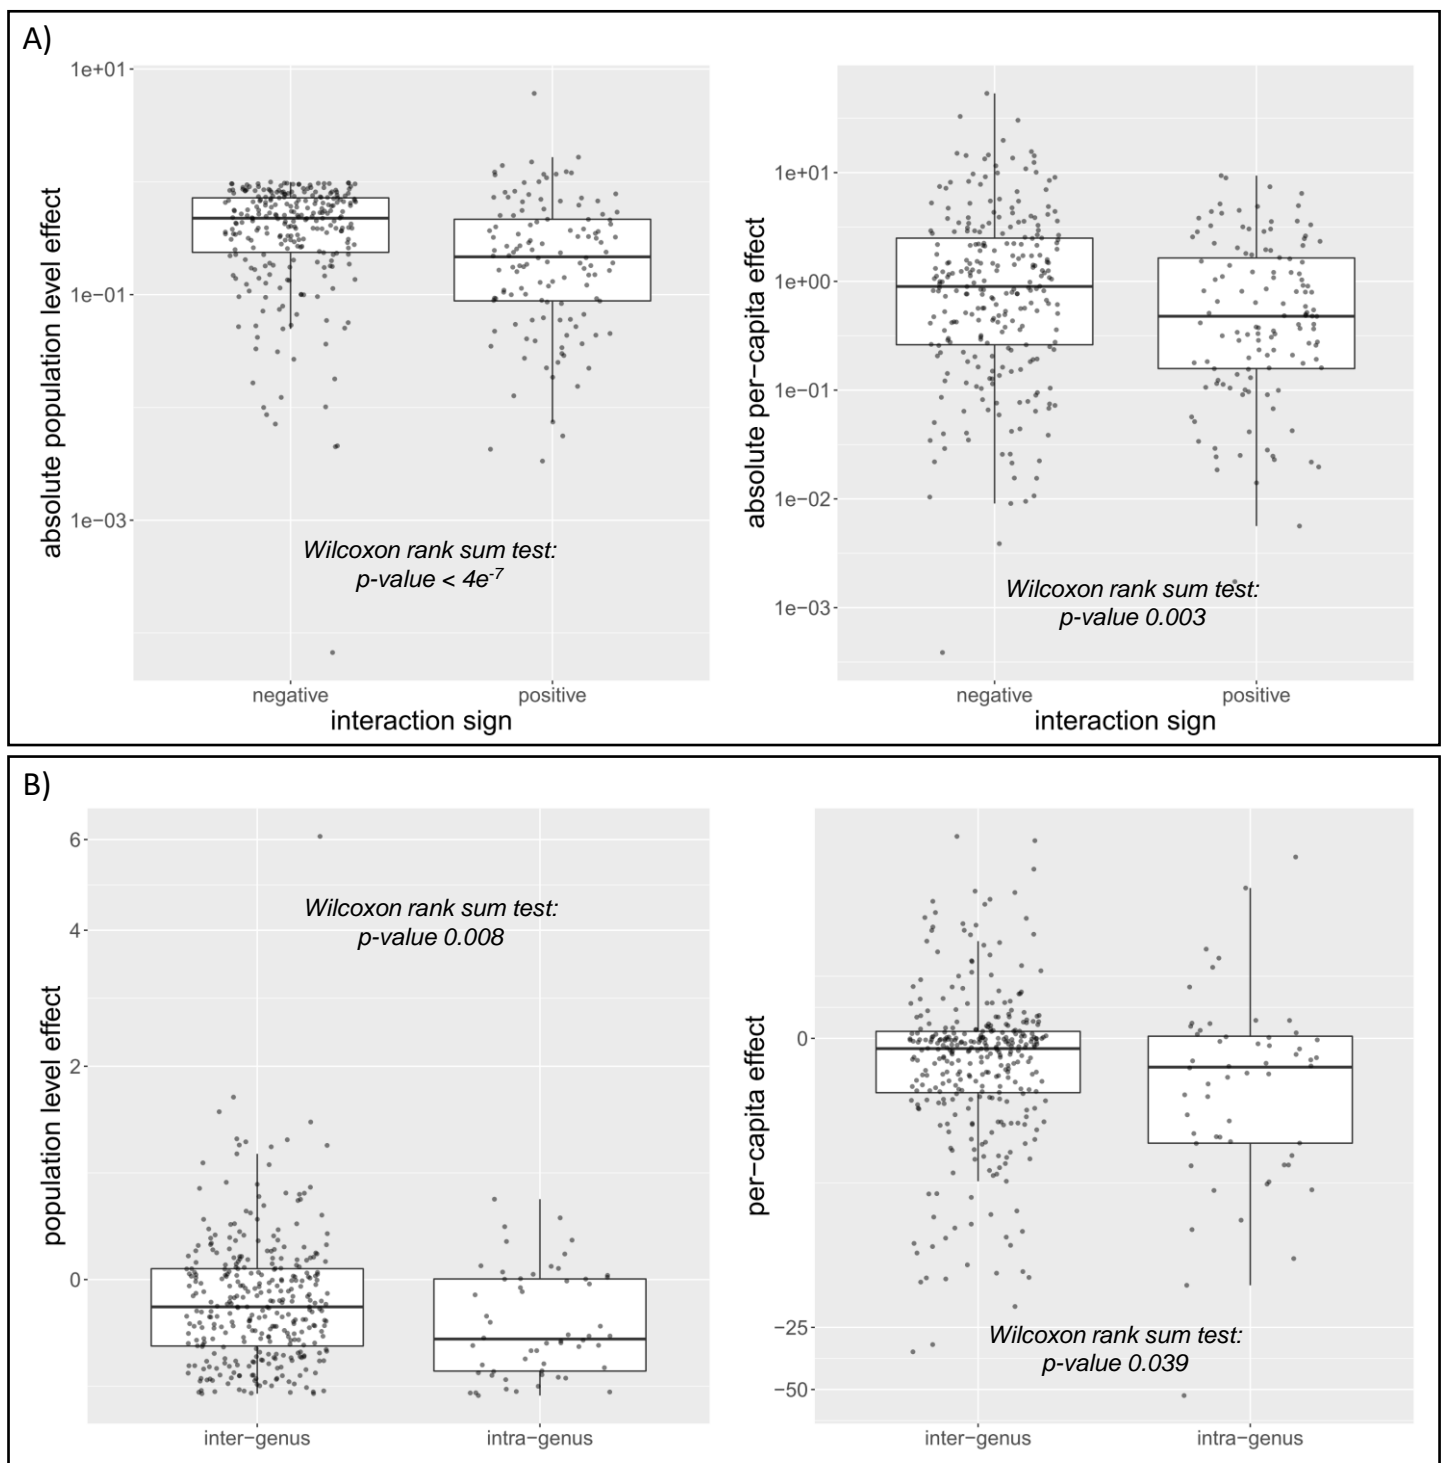

Supplementary Figure 4: Negative interactions were stronger than positive interactions and intra-genus interactions were stronger than inter-genus, related to Figure 2. A) Negative interactions had a significantly larger absolute strength than positive interactions for both population level effects (left) and per-capita effects (right). Interactions are displayed on a log-axis for clarity. B) Intra-genus interactions were significantly more negative than inter-genus interactions for both population level effects (left) and per-capita effects (right). Interactions are displayed on a pseudo-log-axis for clarity.

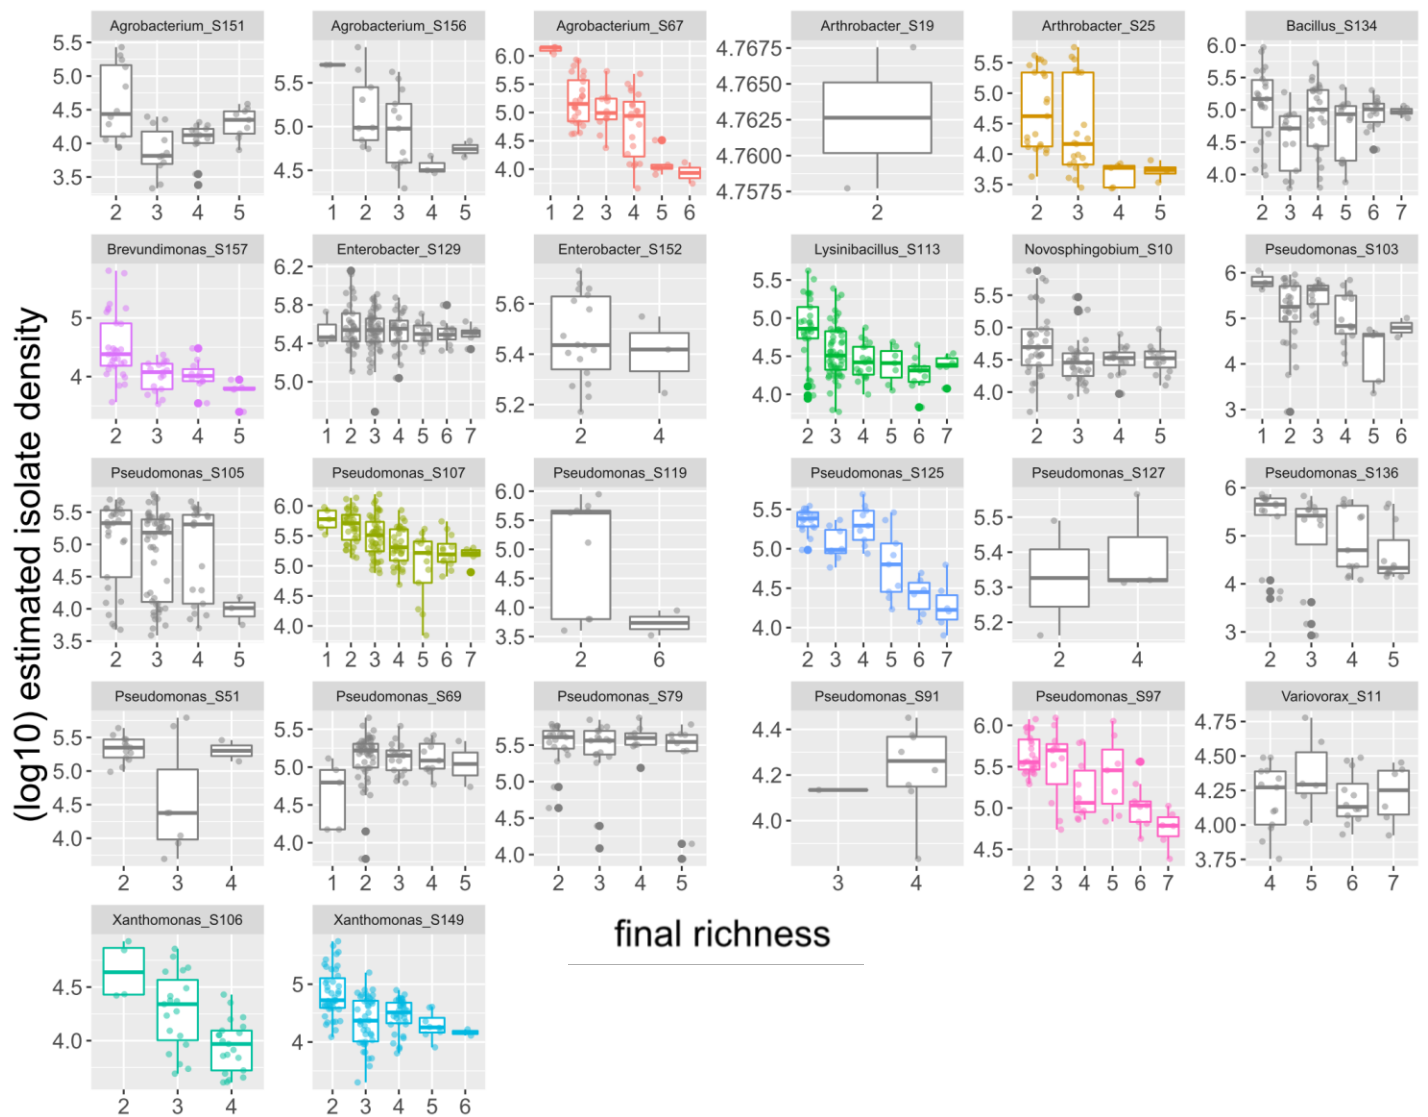

Supplementary Figure 5: Significant relationships between community richness and individual isolate density were all negative, related to Figure 4. Plots in color represent isolates for which the correlation between community richness and estimated isolate density could be investigated and was significant (9 out of 21 isolates,  $p$ -value of Pearson's product-moment correlation was  $< 0.05$  after Bonferroni correction). All instances of a significant correlation displayed a negative relationship between richness and density. Densities of each isolate at each observed richness is plotted on a log scale.

| model: focal change ~ total change |     |     |                         |                     |
|------------------------------------|-----|-----|-------------------------|---------------------|
| richness context                   | n   | df  | adjusted R <sup>2</sup> | p-value             |
| 1 => 2                             | 50  | 48  | 0.74                    | < 5e <sup>-16</sup> |
| 2 => 3                             | 206 | 204 | 0.23                    | 2e <sup>-13</sup>   |
| 3 => 4                             | 78  | 76  | 0.27                    | < 8e <sup>-7</sup>  |
| 4 => 5                             | 32  | 30  | 0.16                    | 0.014               |
| 5 => 6                             | 15  | 13  | 0.28                    | 0.024               |
| 6 => 7                             | 18  | 16  | --                      | 0.19                |

Supplementary Table 2: The explanatory power of the change in total density decreased as the richness context increased, related to Table 1. The model described here is the same as the first model in Table 1, except that it only considers interactions from a single richness context (1=>2, 2=>3, etc.).

| model                                            | df | adjusted R <sup>2</sup> | p-value               |
|--------------------------------------------------|----|-------------------------|-----------------------|
| <i>all contexts</i>                              |    |                         |                       |
| focal change ~ total change                      | 1  | 0.3521                  | < 2.2e <sup>-16</sup> |
| focal change ~ interaction effect                | 1  | 0.09991                 | 3.428e <sup>-14</sup> |
| focal change ~ total change + interaction effect | 2  | 0.4298                  | < 2.2e <sup>-16</sup> |

Supplementary Table 3: Summary of linear regressions modelling the predictive power of interactions across any richness contexts (e.g., 1=>2 & 4=>5), related to Table 2. “Focal change” indicates the change in density of the focal isolate in the predicted context. “Total change” indicates the change in total density between the community contexts of the interaction. “Interaction effect” indicates the change in density of the focal isolate in the interaction context which was not being predicted. We considered predictive power of interactions from the bottom-up, i.e., “interaction effects” came from the lower richness context (continuing the example above, 1=>2), while “total change” came from the predicted higher richness context (4=>5). A “+” in a model indicates the predictors were modeled as separate variables with no interaction.
